## Ammonia and urea transporters in gills of fish and aquatic crustaceans

Dirk Weihrauch, Michael P. Wilkie and Patrick J. Walsh

10.1242/jeb.036103

There were two errors published in *J. Exp. Biol.* **212**, 1716-1730.

In Table 1, the units for 'Total ammonia' are incorrectly listed as  $\mu\text{mol l}^{-1}$  instead of  $\text{mmol l}^{-1}$ , although the units referred to in the text of the article are correct.

Also in Table 1, the mangrove killifish is incorrectly referred to by its previous genus, *Rivulus marmoratus*. It should have been listed as *Kryptolebias marmoratus*, as used in the rest of the article.

The authors apologise sincerely to readers for these errors.
